1 **Pan-cancer proteogenomic landscape of whole-genome doubling reveals putative**  
2 **therapeutic targets in various cancer types**

3

4 **Author names and affiliations**

5 Eunhyong Chang<sup>1,2</sup>, Hee Sang Hwang<sup>3</sup>, Kyu Jin Song<sup>4,5</sup>, Kwoneel Kim<sup>6,7</sup>, Min-Sik Kim<sup>8,9,10</sup>, Se  
6 Jin Jang<sup>3,11</sup>, Kwang Pyo Kim<sup>4,5</sup>, Sungyong You<sup>12,13</sup>, Joon-Yong An<sup>1,2,14,\*</sup>

7

8 <sup>1</sup> Department of Integrated Biomedical and Life Science, Korea University, Seoul 02841,  
9 Republic of Korea

10 <sup>2</sup> L-HOPE Program for Community-Based Total Learning Health Systems, Korea University,  
11 Seoul 02841, Republic of Korea

12 <sup>3</sup> Department of Pathology, University of Ulsan College of Medicine, Asan Medical Center,  
13 Seoul 05505, Republic of Korea

14 <sup>4</sup> Department of Applied Chemistry, Institute of Natural Science, Kyung Hee University,  
15 Yongin 17104, Republic of Korea

16 <sup>5</sup> Department of Biomedical Science and Technology, Kyung Hee Medical Science Research  
17 Institute, Kyung Hee University, Seoul 02453, Republic of Korea

18 <sup>6</sup> Department of Biology, Kyung Hee University, Seoul 02447, Republic of Korea

19 <sup>7</sup> Department of Biomedical and Pharmaceutical Sciences, Kyung Hee University, Seoul  
20 02447, Republic of Korea

21 <sup>8</sup> Department of New Biology, DGIST, Daegu, 42988, Republic of Korea

22 <sup>9</sup> New Biology Research Center, DGIST, Daegu 42988, Republic of Korea

23 <sup>10</sup> Center for Cell Fate Reprogramming and Control, DGIST, Daegu 42988, Republic of Korea

24 <sup>11</sup> Oncoclew Co., Ltd., 31, Ttukseom-ro 1-gil, Seongdong-gu, Seoul 04778, Republic of Korea

25 <sup>12</sup> Department of Urology, Cedars-Sinai Medical Center, Los Angeles, CA 90048, USA

26 <sup>13</sup> Department of Computational Biomedicine, Cedars-Sinai Medical Center, Los Angeles, CA  
27 90048, USA

28 <sup>14</sup> School of Biosystem and Biomedical Science, College of Health Science, Korea University,  
29 Seoul 02841, Republic of Korea

30

31 **\*Correspondence:** [joonan30@korea.ac.kr](mailto:joonan30@korea.ac.kr) (Joon-Yong An)

32

33 **Abstract**

34 **Background:** Whole-genome doubling (WGD) is prevalent in cancer and drives tumor  
35 development and chromosomal instability. Driver mutations in mitotic cell cycle genes and  
36 cell cycle upregulation have been reported as the major molecular underpinnings of WGD  
37 tumors. However, the underlying genomic signatures and regulatory networks involved in  
38 gene transcription and kinase phosphorylation remain unclear. Here, we aimed to  
39 comprehensively decipher the molecular landscape underlying WGD tumors.

40 **Methods:** We performed a pan-cancer proteogenomic analysis and compared 10 cancer  
41 types by integrating genomic, transcriptomic, proteomic, and phosphoproteomic datasets  
42 from the Clinical Proteomic Tumor Analysis Consortium (CPTAC). We also integrated the  
43 cancer dependency data of each cancer cell line and the survival properties of each cancer  
44 patient to propose promising therapeutic targets for patients with WGD.

45 **Results:** Our study delineated distinct copy number signatures characterizing WGD-positive  
46 tumors into three major groups: highly unstable genome, focal instability, and tetraploidy.  
47 Furthermore, the analysis revealed the heterogeneous mechanisms underlying WGD across  
48 cancer types with specific structural variation patterns. Upregulation of the cell cycle and  
49 downregulation of the immune response were found to be specific to certain WGD tumor  
50 types. Transcription factors (TFs) and kinases exhibit cancer-specific activities, emphasizing  
51 the need for tailored therapeutic approaches.

52 **Conclusion:** This study introduces an integrative approach to identify potential TF targets for  
53 drug development, highlighting BPTF as a promising candidate for the treatment of head and  
54 neck squamous cell carcinoma. Additionally, drug repurposing strategies have been  
55 proposed, suggesting potential drugs for the treatment of WGD-associated cancers. Our  
56 findings offer insights into the heterogeneity of WGD and have implications for precision  
57 medicine approaches for cancer treatment.

58

59 **Keywords:** Whole-genome doubling, Pan-cancer, Multi-omics, Cancer genomics,  
60 Personalized medicine, Genome instability, BPTF, Head and neck squamous cell carcinoma

## 61 **Background**

62 Whole-genome doubling (WGD) is prevalent across cancer subtypes, promoting tumor  
63 development and generating chromosomal instability (CIN). WGD plays an important role in  
64 tumorigenesis by cushioning the deleterious mutations and rapidly accumulating genetic  
65 abnormalities. However, WGD is also associated with tolerance to genomic instability, which  
66 leads to cell death<sup>1-3</sup>. Previous studies have investigated the genomic alterations associated  
67 with WGD, revealing that *TP53* mutations and defects in the E2F-mediated G1 arrest are  
68 common in WGD-positive tumors<sup>1</sup>. Moreover, gene expression studies have highlighted the  
69 enrichment of genes involved in cellular proliferation, mitotic spindle formation, and DNA  
70 repair, whereas inflammatory pathways are downregulated in WGD-positive tumors<sup>2</sup>. These  
71 findings depict the overall pan-cancer characteristics of WGD; however, the role of WGD can  
72 be highly heterogeneous<sup>2,4-7</sup>.

73 Recent proteomic studies have delineated novel mechanisms underlying diverse  
74 cancer subtypes<sup>8</sup>. These investigations have revealed associations between certain  
75 multiomic subtypes that are indicative of WGD. For example, in head and neck squamous  
76 cell carcinoma (HNSCC), a distinct molecular subtype has been characterized by high CIN and  
77 upregulated cell cycle pathways at both the proteome and phosphoproteome levels<sup>9</sup>.  
78 Similar WGD-associated subtypes have been detected in non-small cell lung cancer (NSCLC),  
79 endometrial cancer, breast cancer (BRCA), colon cancer, and glioblastoma (GBM)<sup>10-14</sup>.  
80 Despite mounting evidence implicating WGD-related subtypes across multiple cancers, a  
81 pan-cancer multiomics investigation focusing on WGD remains elusive. In addition, the  
82 proteomic features and kinase activities governing WGD in cancer are yet to be elucidated.  
83 Furthermore, the development of therapeutic strategies that specifically target WGD-  
84 positive tumors remains an unmet need.

85 In this study, we aimed to conduct a pan-cancer proteogenomic analysis to delineate  
86 the genomic and proteomic landscapes of WGD across ten types of cancer by integrating  
87 genomic, transcriptomic, proteomic, and phosphoproteomic data sets. Our objective was to  
88 characterize the molecular pathways, transcription factor (TF) regulation, and kinase  
89 phosphorylation networks enriched in association with the WGD. Finally, we explored the  
90 potential drug targets and repositioning strategies for patients with WGDs.

91

92

## 93 Results

### 94 Pan-cancer analysis to identify CN signatures underlying WGD

95 We sought to explore the proteogenomic features associated with WGD by analyzing  
96 comprehensive genomic, transcriptomic, proteomic, and phosphoproteomic datasets  
97 obtained from the Clinical Proteomic Tumor Analysis Consortium (CPTAC) (**Figure 1A**). The  
98 dataset comprised 1,060 patients representing 10 types of cancer: breast cancer (BRCA)<sup>12</sup>,  
99 clear cell renal cell carcinoma (CCRCC)<sup>15</sup>, colon adenocarcinoma (COAD)<sup>13</sup>, glioblastoma  
100 (GBM)<sup>14</sup>, high-grade serous carcinoma (HGSC)<sup>16,17</sup>, head and neck squamous cell carcinoma  
101 (HNSCC)<sup>9</sup>, lung adenocarcinoma (LUAD)<sup>11</sup>, lung squamous cell carcinoma (LSCC)<sup>10</sup>,  
102 pancreatic ductal adenocarcinoma (PDAC)<sup>18</sup>, and uterine corpus endometrial carcinoma  
103 (UCEC)<sup>12</sup>. By determining the WGD status of each sample, we observed a bimodal  
104 distribution of patients, indicating the existence of two distinct groups of cancers  
105 irrespective of the cancer type (**Figure 1B**). Consistent with previous estimates,  
106 approximately 42% of the tumors (440 of 1,060 samples) exhibited at least 1 occurrence of  
107 WGD during their evolutionary process<sup>1,2</sup>. We also identified substantial variability in the  
108 occurrence of WGD across different tumor types, with HGSC showing the highest prevalence  
109 (83%, 65/78 samples) and PDAC showing the lowest (9.4%, 13/139 samples) (**Figure 1C**).

110 Mutation signature analyses demonstrated that WGD was associated with specific  
111 copy number signatures (**Table S1B**). Based on the 25 CN signature values of the WGD-  
112 positive samples, different cancer types exhibited varying combinations of CN signatures,  
113 suggesting that the underlying mechanisms of WGD might be distinct across cancer types  
114 (**Figure 1D**). In patients with LSCC, those with WGD showed significant enrichment for CN7  
115 (FDR =  $3.11 \times 10^{-5}$ ), indicating chromothripsis amplification, as well as for CN15 (FDR =  
116  $2.87 \times 10^{-2}$ ), signifying chromosomal loss-of-heterozygosity (LOH) with twice-genome-  
117 doubling (**Figure S1A; Table S1B**). Similarly, patients with HNSCC showed significant  
118 enrichment of CN15 in WGD-positive samples (FDR =  $4.63 \times 10^{-6}$ ). Patients with LUAD showed  
119 enrichment of the CN7 signature (FDR =  $5.39 \times 10^{-4}$ ). WGD in BRCA and HGSC correlated  
120 significantly with CN11, a signature of focal LOH, with two WGD events (BRCA, FDR =  $1.71 \times 10^{-5}$ ;  
121 HGSC, FDR =  $2.68 \times 10^{-13}$ ), suggesting that WGD in these malignancies occurred within a  
122 focally unstable genomic context. A majority of WGD samples from CCRCC, COAD, GBM,  
123 PDAC, and UCEC were found to be significantly enriched for CN2 (FDR < 0.05), indicating  
124 tetraploidy. Based on these observations, we defined three distinct WGD status in LSCC,

125 LUAD, and HNSCC as “WGD type 1,” that in BRCA and HGSC as “WGD type 2,” and that in  
126 CCRCC, COAD, GBM, PDAC, and UCEC as “WGD type 3.” The WGD status was present in a  
127 coherent grouping of samples, wherein cancer types with similar CN signatures exhibited  
128 spatial proximity (**Figure 1E**).

129 We further evaluated the driver mutations associated with WGD in each tumor type.  
130 Despite previous reports suggesting an enrichment of *TP53* mutations in WGD tumors across  
131 diverse cancers <sup>1,2</sup>, we identified a significant enrichment of *TP53* mutations exclusively in  
132 the WGD-positive samples of BRCA, COAD, UCEC, and LUAD ( $p < 0.05$ ; Fisher’s exact test)  
133 (**Figure 1F; Table S1C**). Although no common gene mutations were identified, we observed  
134 that over 100 mutations were significantly enriched in association with WGD in LSCC, LUAD,  
135 and HNSCC (WGD type 1), whereas other cancer types exhibited fewer than 15 significant  
136 gene mutations associated with WGD. As a highly unstable genome has been linked to a  
137 higher tumor mutational burden (TMB) <sup>19,20</sup>, we speculated that the TMB would be higher in  
138 WGD type 1. We found significantly higher TMB in WGD-positive samples than in WGD-  
139 negative samples across 10 cancer types ( $p = 3.12 \times 10^{-4}$ ; Wilcoxon rank-sum test) (**Figure**  
140 **S1A**), and in LSCC, LUAD, HNSCC, and BRCA when compared across individual cancer types ( $p$   
141  $< 0.05$ ; Wilcoxon rank-sum test) (**Figure S1B**). WGD-positive samples in COAD exhibited  
142 significantly lower TMB than WGD-negative samples ( $p = 2.13 \times 10^{-4}$ ; Wilcoxon rank-sum test).  
143 Nevertheless, *TP53* and *APC* mutations remained significantly enriched in samples with WGD  
144 in COAD (*TP53*,  $p = 1.75 \times 10^{-3}$ ; *APC*,  $p = 2.31 \times 10^{-2}$ ; Fisher’s exact test) (**Figure 1F**). This is  
145 consistent with the findings of prior investigations suggesting an association between *APC*  
146 mutations and aneuploidy in COAD <sup>21-23</sup>. These observations imply that genomic instability is  
147 a catalyst for WGD in LSCC, LUAD, and HNSCC, whereas *TP53* and *APC* mutations may serve  
148 as primary drivers of WGD in COAD. In summary, our findings revealed distinct CN signatures  
149 of WGD, allowing us to define three types of WGD.

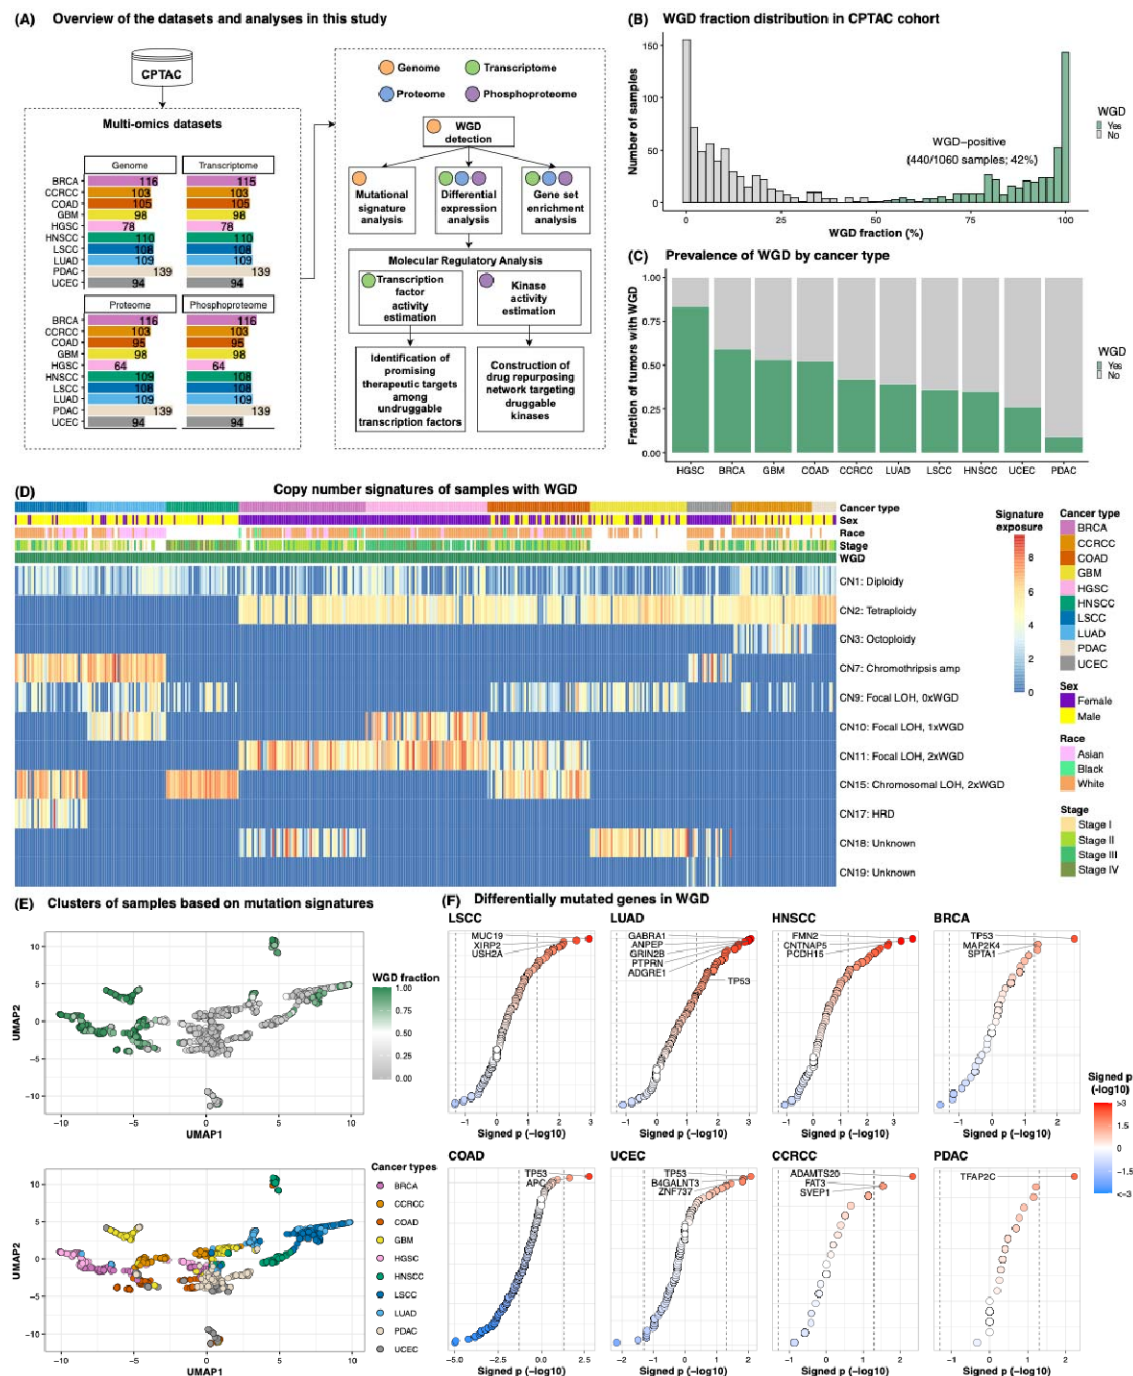

150

151 **Figure 1. Copy number signatures associated with WGD**

152 **(A)** Schematic representation of the multi-omics datasets collected for each cancer type and  
 153 the subsequent analysis pipeline. BRCA, breast cancer; CCRCC, Clear cell renal cell carcinoma;  
 154 COAD, colon adenocarcinoma; GBM, Glioblastoma; HGSC, High-grade serous carcinoma;  
 155 HNSCC, Head and neck squamous cell carcinoma; LSCC, Lung squamous cell carcinoma;  
 156 LUAD, Lung adenocarcinoma; PDAC, Pancreatic ductal adenocarcinoma; UCEC, Uterine  
 157 corpus endometrial carcinoma. **(B)** Distribution of the WGD fraction within the CPTAC cohort,  
 158 displaying a bimodal pattern. **(C)** Prevalence of WGD by cancer type. **(D)** Heatmap based on  
 159 copy number signature exposure values in samples with WGD. Copy number signatures were

160 derived from the Catalogue Of Somatic Mutations In Cancer (COSMIC). **(E)** UMAP plot based  
161 on signature exposure values of single-base-substitution, double-base-substitution, indel,  
162 and copy number alteration. Each dot indicates samples and is colored based on WGD  
163 fraction (top) and cancer types (bottom). **(F)** Dot plot depicting differentially mutated genes  
164 in WGD in each cancer type. The position of each dot along the x-axis and the color of the  
165 dots indicate signed p-values obtained from Fisher's exact test. Only the top three significant  
166 genes were labeled in each cancer type, except for COAD and PDAC, for which only two and  
167 one significant genes, respectively, were noted. In LUAD, *PTPRN*, *GRIN2B*, *ANPEP*, and  
168 *ADGRE1* genes exhibited the same p-values, and *TP53* was additionally labeled.

169

### 171 **Enrichment of distinct pathways in WGD in each cancer type**

172 Previous studies have reported activation of the cell cycle pathway and inactivation of the  
173 immune response pathway in tumors with WGD <sup>1,2,24,25</sup>. Given the various CN signatures  
174 underlying WGD across cancer types, we conducted a sample-level pathway enrichment test  
175 with 1,060 samples and examined the biological pathways enriched in WGD (**Figure 2A**).  
176 Overall, WGD-positive tumors were significantly affected by several pathways (**Table S2A**),  
177 which were subsequently categorized into four major pathway groups: cell motility, immune  
178 response, cell cycle, and metabolism. WGD type 1 tumors, characterized by a highly unstable  
179 genome, showed significant upregulation of the cell cycle and downregulation of immune  
180 response pathways (**Figure 2B and 2C**), which is consistent with previous reports <sup>1,2,24,25</sup>. In  
181 contrast, WGD type 2 tumors showed significant enrichment in the dTTP metabolism  
182 pathway, which is responsible for DNA synthesis and maintenance <sup>26,27</sup> ( $p < 0.01$ ; Wilcoxon  
183 rank-sum test), and the DNA endoreduplication pathway, a known mechanism inducing  
184 WGD <sup>28,29</sup> ( $p < 0.05$ ; Wilcoxon rank-sum test) (**Figure 2SA and 2SB**). Among other cancer  
185 types, WGD tumors in COAD showed significant activation of the Wnt signaling pathway,  
186 possibly attributed to *APC* mutation, in line with the findings of previous studies <sup>30-32</sup> ( $p =$   
187  $2.09 \times 10^{-3}$ ; Wilcoxon rank-sum test) (**Figure 2SC**). These results emphasize that upregulation  
188 of the cell cycle and downregulation of the immune response are specific to WGD type 1  
189 tumors, suggesting diverse functional attributes of WGD across distinct cancer types.

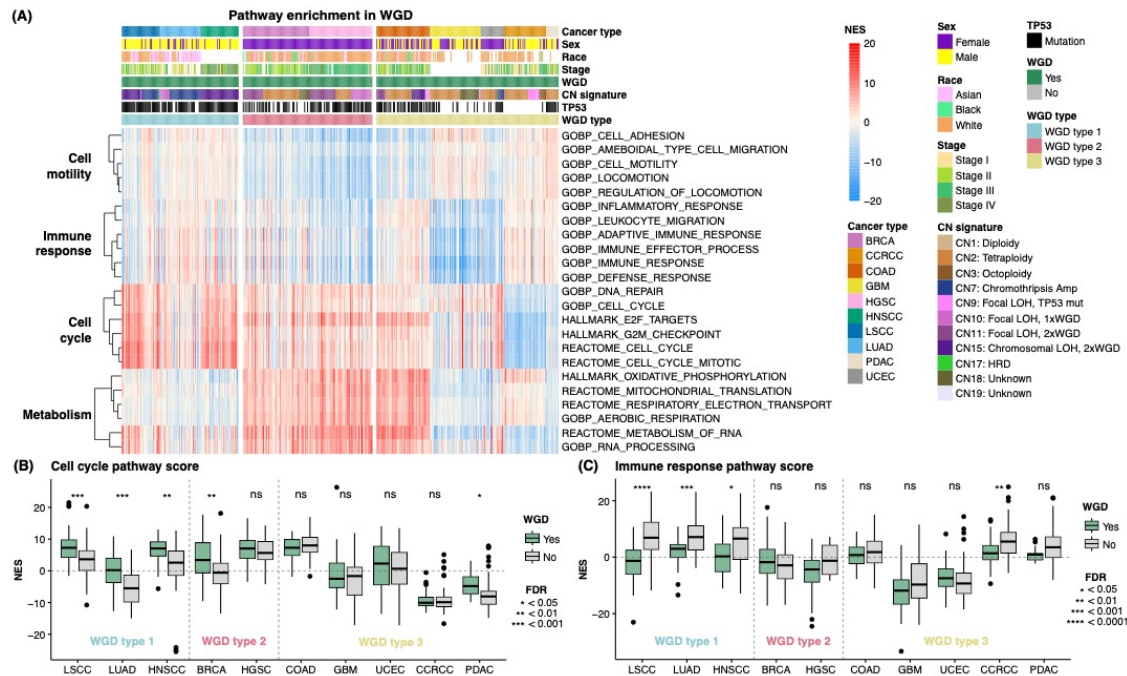

190

## 191 Figure 2. Pathway enrichment in WGD-positive tumors

192 **(A)** Normalized enrichment scores (NES) of pathways related to cell motility, immune  
 193 response, cell cycle, and metabolism in WGD-positive tumors. Pathways exhibiting  
 194 significance (FDR < 0.05) and a log fold-change greater than 0.25 are shown. **(B–C)** Boxplot  
 195 comparing NES score of cell cycle pathway (HALLMARK\_E2F\_TARGETS) and immune  
 196 response pathway (GOBP\_IMMUNE\_RESPONSE) between WGD-positive and WGD-negative  
 197 tumors in individual cancer types.

198

199

## 200 WGD-specific TFs as potential therapeutic targets

201 To identify potential therapeutic targets for treating WGD across various tumor  
 202 types, we first estimated TF activity using the TF-target gene interaction network database<sup>33</sup> and the  
 203 gene expression levels of target genes (see Methods). Out of the 1,134 TFs analyzed, the E2F  
 204 family and MYC TFs showed significant activation (FDR < 0.05) in pan-cancer WGD tumors,  
 205 indicating the role of cell cycle regulation in WGD pathophysiology<sup>34,35</sup> (**Figure 3A**; **Table**  
 206 **S3A**). In contrast, the TFs that were significantly downregulated in the WGD-positive tumors  
 207 were predominantly associated with immune response pathways. While different TFs were  
 208 activated in WGD-positive tumors across different cancer types (**Figure 3B**), E2F1, E2F2, E2F3,  
 209 E2F4, and MYC were common TFs with significant activation in five cancer types (LSCC, LUAD,  
 210 HNSCC, BRCA, and PDAC) that showed upregulation of the cell cycle pathway (**Figure 2B**).

211

212 Since many TFs have been deemed as ‘undruggable’ due to their structural  
 complexities and a lack of tractable binding sites<sup>36,37</sup>, we introduced an integrative



213 framework to prioritize WGD-activated TFs as putative therapeutic targets (**Figures 3C and**  
214 **3SA–I; Table S3C**). Among the 99 TFs that exhibited significant activation in each tumor type  
215 (FDR < 0.1), we first selected TFs that were detected in CPTAC proteomics data with high  
216 confidence (FDR < 0.01). We then filtered TFs exhibiting significantly upregulated protein  
217 expression in WGD-positive tumors compared to WGD-negative tumors. We found that the  
218 protein expression of IRX2, GLI2, E2F4, and TFDP1 in LSCC, E2F3 in LUAD, BPTF, REST, and  
219 SFPQ in HNSCC, and SREBF2 (also known as SREBP2) in BRCA was significantly upregulated  
220 (FDR < 0.05, integrated hypothesis test) (**Figure 3D**). The cancer dependencies of these TFs in  
221 each cancer cell line were then evaluated by comparing the dependencies between cells  
222 with and without WGD. Among the nine TFs that showed significant upregulation at the  
223 protein level, four TFs including IRX2 in LSCC and BPTF, REST, and SFPQ in HNSCC exhibited  
224 significantly decreased viability in cells with WGD upon CRISPR-mediated depletion ( $p < 0.1$ ,  
225 Wilcoxon rank-sum test) (**Figure 3E**). Finally, we selected the TFs with high protein  
226 expression levels that were associated with poor prognosis. We found a significant  
227 association between high BPTF protein expression and unfavorable prognosis in HNSCC ( $p =$   
228  $0.017$ , log-rank test) (**Figure 3F**). BPTF is reported as a co-factor of c-MYC leading to c-MYC-  
229 driven proliferation and G1 to S progression<sup>38</sup>, and we also observed significant activation of  
230 MYC in HNSCC (FDR =  $5.66 \times 10^{-3}$ ). Our findings suggest that deactivating BPTF in patients with  
231 WGD-positive HNSCC could slow down cancer cell proliferation, which may ultimately  
232 benefit patient survival.

233 Several TFs did not meet the criteria outlined in our integrative framework; however,  
234 they remain potential candidates for further consideration as therapeutic targets. In LSCC,  
235 GLI2 showed both significant activation (FDR =  $9.37 \times 10^{-2}$ ) and upregulation at both mRNA  
236 and protein levels (mRNA, FDR =  $1.71 \times 10^{-8}$ , Wald test; protein, FDR =  $1.72 \times 10^{-3}$ , integrated  
237 hypothesis test) (**Figure S3B; Table S3C**). As GLI2 is known to promote cell proliferation and  
238 cancer cell survival by upregulating the expression of antiapoptotic proteins in LSCC<sup>39</sup>,  
239 degrading GLI2 may be a promising strategy for the treatment of patients with LSCC  
240 harboring WGD. Additionally, TFDP1 and TFDP2, which are partner proteins of the E2F family  
241 crucial for the G1 to S phase transition<sup>40,41</sup>, were identified as potential therapeutic targets  
242 for WGD-positive samples in LSCC, HNSCC, PDAC, and HGSC, in which these TFs were  
243 significantly activated (FDR < 0.1) (**Figure S3A, S3B, S3E, and S3I**). In LUAD, E2F3 showed  
244 significant activation (FDR =  $3.60 \times 10^{-4}$ ) and upregulation at both mRNA and protein levels

245 (mRNA,  $FDR = 3.16 \times 10^{-5}$ , Wald test; protein,  $FDR = 1.83 \times 10^{-3}$ , integrated hypothesis test)  
 246 (**Figure S3C**). Therefore, E2F3 inhibitors such as Edifoligide could be a potential treatment for  
 247 LUAD in patients with WGD. Furthermore, in BRCA, SREBF2 showed significant activation  
 248 ( $FDR = 8.67 \times 10^{-2}$ ) along with upregulated protein expression ( $FDR = 2.42 \times 10^{-2}$ , integrated  
 249 hypothesis test) (**Figure S3D**). Targeting SREBF2 could be effective for WGD-positive BRCA  
 250 samples since SREBF2 is known to regulate the synthesis of cholesterol which is crucial for  
 251 cancer cell viability in breast cancer cells<sup>42-44</sup>. Taken together, our integrative framework  
 252 incorporated protein expression, cancer dependency, and association with patient survival  
 253 to delineate effective therapeutic targets among significantly activated TFs. Based on our  
 254 analysis, we propose that BPTF could potentially serve as a therapeutic target for WGD-  
 255 positive samples in HNSCC, thereby improving patient prognosis.

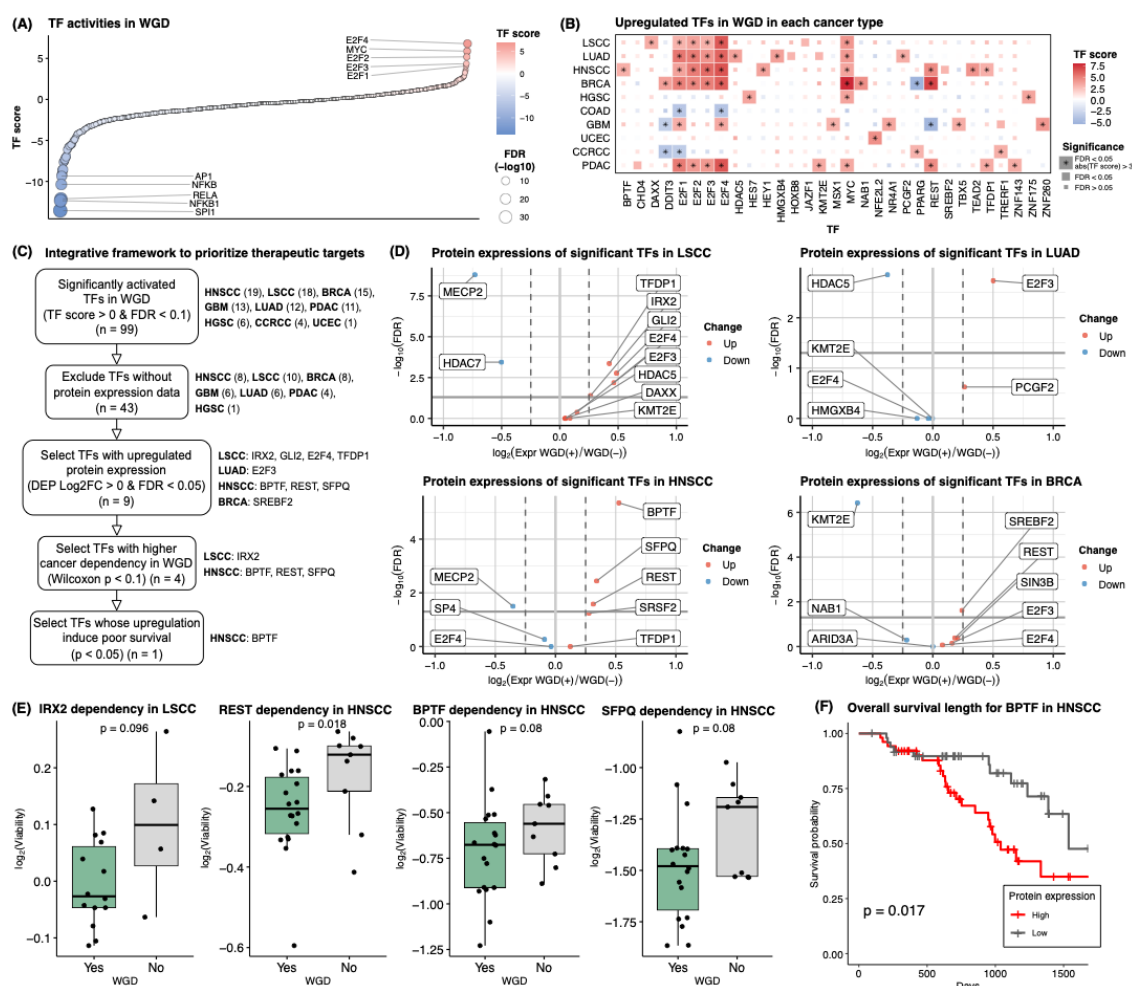

256

257 **Figure 3. Deciphering potential therapeutic targets among activated TFs in WGD**

258 **(A)** Dot plot depicting estimated TF scores in WGD-positive versus WGD-negative tumors  
 259 across pan-cancer analysis. The top and bottom five TFs, ranked by TF score, are labeled. **(B)**

260 Significantly upregulated TFs in WGD in each tumor type. The tiles are colored based on the  
261 TF estimation score, and TFs meeting the criteria of  $FDR < 0.05$  and TF score  $> 3$  are denoted  
262 with asterisks. **(C)** Schematic diagram showing the filtering processes to identify effective  
263 therapeutic targets. The number of TFs or the name of TFs remaining after each step is  
264 indicated on the right. **(D)** Volcano plots of differentially expressed proteins among  
265 significant TFs in WGD-positive tumors compared to WGD-negative tumors. **(E)** Boxplots  
266 comparing  $\log_2$  cell viability between WGD-positive and WGD-negative cells after depleting  
267 genes with CRISPR in each cancer cell line. **(F)** Kaplan–Meier curve of overall survival based  
268 on protein expression levels of BPTF in HNSCC.

269

270

### 271 **Drug repurposing strategies to target key kinases in WGD**

272 As kinases are one of the well-known druggable proteins<sup>37,45</sup>, we next questioned whether  
273 we can suggest treatment strategies by deciphering kinase activities in WGD and matching  
274 appropriate drugs targeting these kinases. To estimate kinase activities in the WGD in each  
275 tumor type, we utilized a kinase-substrate interaction database<sup>46</sup> and phosphoprotein  
276 expression data of substrates (see Methods). Consistently, we observed that cancer types  
277 with upregulated cell cycle pathways exhibited CDK1 and CDK2 activation ( $FDR < 0.1$ ) (**Figure**  
278 **4A; Table S4A**). The protein expression of these cyclin-dependent kinases was also  
279 significantly upregulated ( $FDR < 0.05$ , integrated hypothesis test) (**Figure 4B**). Apart from cell  
280 cycle regulation, kinases involved in the DNA damage response and hypoxia-induced  
281 autophagy were significantly activated in some tumors. CSNK2A1, which phosphorylates key  
282 components of DNA damage and repair pathways<sup>47</sup>, was significantly activated in LSCC and  
283 LUAD (LSCC,  $FDR = 7.62 \times 10^{-5}$ ; LUAD,  $FDR = 1.05 \times 10^{-3}$ ) (**Figure 4A; Table S4A**). Additionally, in  
284 LSCC, PAK4 showed significant activation in WGD ( $FDR = 6.70 \times 10^{-3}$ ). It is known to promote  
285 proliferation and suppress apoptosis<sup>48,49</sup>, and its overexpression has been linked to poor  
286 prognosis in NSCLC<sup>50</sup>. In BRCA, both PRKAA2 (also known as AMPK2) and ULK1 were  
287 significantly activated (PRKAA2,  $FDR = 8.34 \times 10^{-2}$ ; ULK1,  $FDR = 3.21 \times 10^{-2}$ ). PRKAA2 induces  
288 autophagy during glucose starvation by phosphorylating ULK1<sup>51,52</sup>. These results imply that  
289 although WGD can drive tumorigenesis by accelerating cell proliferation, it can also induce  
290 DNA damage and hypoxia, necessitating kinase activation to inhibit apoptosis, as previously  
291 noted<sup>1-3</sup>.

292 Next, we sought to identify putative drug targets for kinases with upregulated  
293 expression in WGD using protein-protein and protein-drug interactions<sup>53</sup> (see Methods).  
294 Our analysis revealed that nintedanib was the most promising treatment for WGD in LSCC

295 and LUAD, as it interacts with a majority of significantly activated kinases in these cancers  
 296 (Figure 4C; Table S4B). Nintedanib is a small-molecule tyrosine kinase inhibitor that is used  
 297 for NSCLC patients along with docetaxel after the first line of chemotherapy<sup>54</sup>. For WGD in  
 298 COAD, bosutinib and ruxolitinib were suggested to target PLK1 kinase, a pivotal regulator of  
 299 mitotic events frequently overexpressed in colon cancers<sup>55-58</sup>. These drugs have been  
 300 reported to induce apoptosis in colon cancer cells<sup>59,60</sup>. Sunitinib was recommended as the  
 301 most suitable drug for BRCA patients with WGD, supported by its efficacy in BRCA reported  
 302 in some studies<sup>61,62</sup>, although caution is advised when applying it to metastatic breast  
 303 cancer patients<sup>63</sup>. Overall, our findings unraveled cancer-type-specific kinase activations in  
 304 WGD contributing to cell proliferation, DNA damage response, and hypoxia-driven  
 305 autophagy. Based on these findings, we proposed FDA-approved drugs for treating patients  
 306 with WGD in each tumor type.

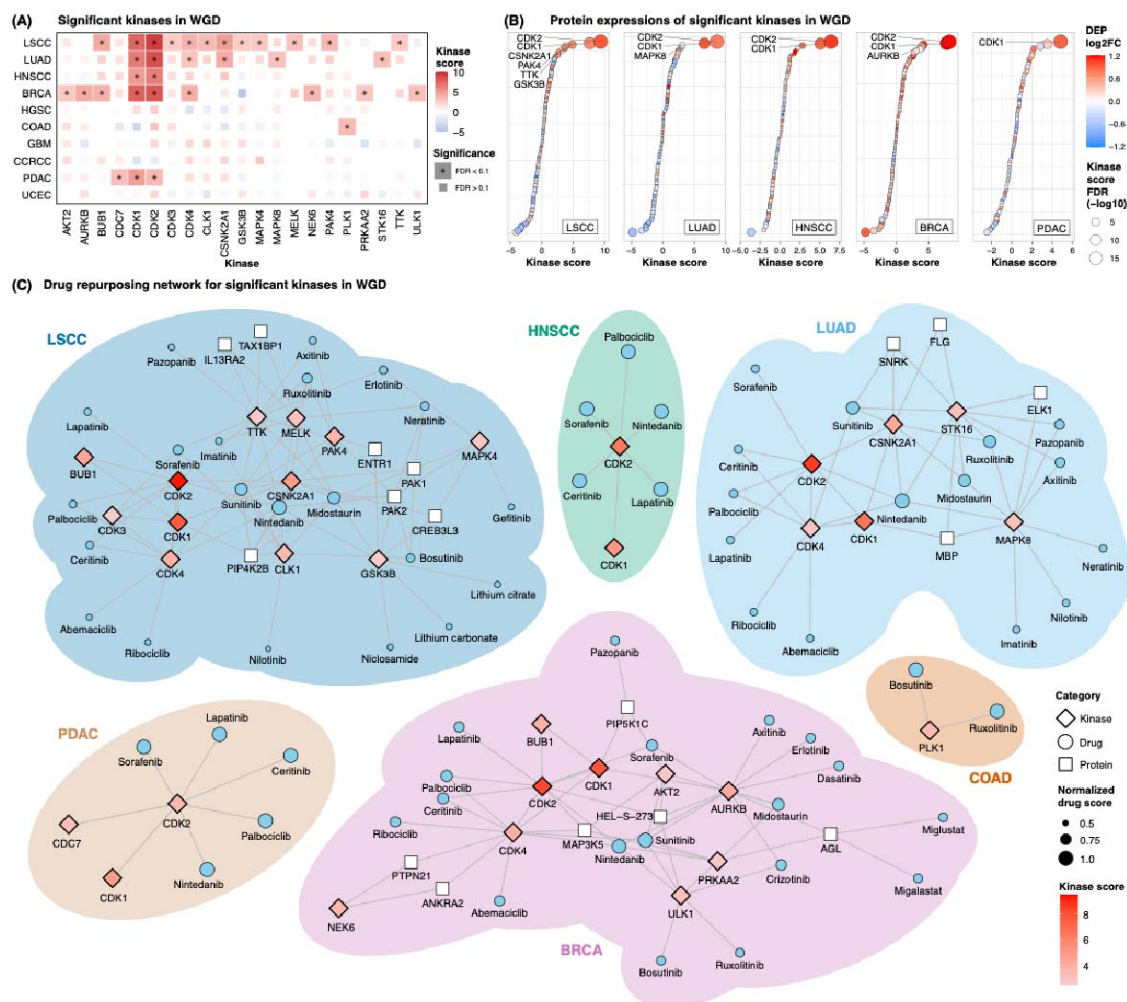

307

308 **Figure 4. Drug repurposing strategies to target key kinases in WGD**

309 **(A)** Kinases with significant upregulation of expression in association with WGD in each  
310 tumor type. The tiles are colored based on the kinase estimation score, and kinases showing  
311 significant upregulation are denoted with asterisks. **(B)** Dot plot depicting differentially  
312 expressed proteins among significantly upregulated kinases in WGD-positive tumors  
313 compared to WGD-negative tumors. Kinases with significant upregulation of protein  
314 expression (FDR < 0.05 and log<sub>2</sub>-fold-change > 0), as well as activation (FDR < 0.1), have  
315 been labeled. **(C)** Drug repurposing network for key kinases associated with WGD in each  
316 tumor type.

317

318

## 319 **Discussion**

320 Our study elucidated the proteogenomic characteristics of WGD in a cancer-type-specific  
321 manner. CN signatures were used to characterize WGD tumors into three major groups:  
322 WGD type 1, with a highly unstable genome (LSCC, LUAD, and HNSCC); type 2, with focal  
323 instability (BRCA and HGSC); and type 3, with tetraploidy (CCRCC, COAD, GBM, PDAC, and  
324 UCEC). This classification seems to align with cancer-specific profiles of structural variation<sup>64</sup>.  
325 Triple-negative breast cancer and ovarian cancer are enriched in an SV class, characterized  
326 by a high burden of deletions, duplications, and templated insertion chains. LSCC and HNSCC  
327 are characterized by an enriched breakage fusion bridge cycle, which is a mechanism of  
328 chromosomal instability<sup>65</sup>. The presence of CN7 and CN15 signatures underscores the  
329 occurrence of WGD in a genomically unstable environment at the chromosomal level<sup>66</sup>.

330 While the etiology of CN18 remains unknown, we observed its enrichment in WGD-  
331 positive BRCA and GBM. CN18 has been linked to TP53 mutation in BRCA<sup>66</sup>, and our study  
332 demonstrates a significant enrichment of TP53 mutation in WGD-positive BRCA samples.  
333 This implies CN18 in BRCA may be a WGD signature driven by TP53 mutation. Additionally,  
334 CN18 has been associated with hypoxia, which is known to induce polyploid giant cancer  
335 cells with stem-like phenotypes in GBM<sup>67,68</sup>. As a hypoxic condition in GBM has been linked  
336 to advanced tumor stage and invasion<sup>69</sup>, CN18 in GBM may imply hypoxia-driven WGD with  
337 an invasive cell state.

338 In recent studies, WGD tumors have been predominantly characterized by an  
339 upregulated cell cycle and a downregulated immune response<sup>1,2,24,25</sup>. However, our study  
340 demonstrated that this pattern is specific to WGD type 1 (LSCC, LUAD, and HNSCC) and does  
341 not entirely represent other types of WGD-positive tumors. For these cancer types,  
342 significant activation of E2F and MYC seemed to regulate the cell cycle pathway in WGD-

343 positive tumors. Instead, the activities of TFs and kinases were more cancer-type-specific  
344 than consistent across WGD types.

345 Our study has important therapeutic implications for WGD tumors. Given the  
346 challenges of targeting undruggable TFs <sup>36,37,45</sup>, we introduced an integrative approach to  
347 identify putative TF targets for new drug development, requiring high protein expression  
348 levels, increased cancer dependency, and poorer prognosis in patients with WGD. Based on  
349 these criteria, we identified BPTF as a promising target for treating patients with HNSCC  
350 harboring WGD. For kinases associated with WGD, we employed a drug repurposing strategy  
351 using search algorithms to identify the most suitable drugs targeting these kinases. Drug  
352 repositioning is a cost-effective approach for identifying effective treatments without the  
353 need for extensive time or resources for new drug development <sup>70</sup>. We found nintedanib for  
354 LSCC and LUAD, bosutinib and ruxolitinib for COAD, and sunitinib for BRCA were  
355 recommended as potential drugs for treating WGD patients. Further studies are warranted  
356 to evaluate the efficacy of drugs targeting WGD-specific TFs and of repurposed drugs in  
357 patient cohorts with WGD. This additional investigation is essential for advancing precision  
358 medicine approaches tailored to WGD-associated cancers.

359 Despite our comprehensive analysis, there are limitations within our study. For  
360 cancer types included in CPTAC phase 2 (BRCA, COAD, and HGSC), whole-exome sequencing  
361 data were utilized to infer WGD, a method potentially less precise than whole-genome  
362 sequencing. In addition, our research covered only 1,060 samples across 10 tumor types,  
363 indicating the necessity for larger-scale proteogenomic investigations to fully understand  
364 WGD characteristics in various cancers. Future studies should consider employing single-cell  
365 and spatial proteomics to gain insights into the cellular dynamics and properties of WGD  
366 tumor cells. Furthermore, the effectiveness of BPTF inhibitors in WGD-positive HNSCC,  
367 among other drugs for WGD-positive tumors, requires further validation. Despite these  
368 limitations, our study on the proteogenomic landscape of WGD across cancers could provide  
369 therapeutic insights for treating WGD-related subtypes in individual tumor types, supporting  
370 the groundwork for future research endeavors.

371

372 **Acknowledgments**

373 This study was supported by the National Research Foundation of Korea (NRF) grant funded  
374 by the Korea government (NRF-2019M3E5D3073568 to Joon-Yong An) and by the Ministry  
375 of Science and ICT (NRF-2022R1A2C2013377 to Min-Sik Kim), the Korea Health Industry  
376 Development Institute (KHIDI) funded by the Ministry of Health & Welfare, Republic of Korea  
377 (RS-2023-00304839 to Kwoneel Kim), and Korea University to Joon-Yong An. Eunhyong  
378 Chang received a scholarship from the Kwanjeong Educational Foundation and the Brain  
379 Korea (BK21) FOUR education program.

380

381 **Conflict of interest**

382 Kwang Pyo Kim is the CEO of NioBiopharmaceuticals, Inc. Se Jin Jang is the chief executive  
383 officer of Oncoclew, Co., Ltd. All other authors report no conflict of interest.

384

385 **Data availability statement**

386 Public CPTAC datasets are available within 11 publications<sup>9-18</sup>. Genome and transcriptome  
387 data were downloaded from the GDC data portal (<https://portal.gdc.cancer.gov>). Global  
388 proteomic and phosphoproteomic data were downloaded from LinkedOmics  
389 (<https://www.linkedomics.org/>). All data generated during this study are included in  
390 Supporting Information.

391

392 **Authors' contributions**

393 Eunhyong Chang and Joon-Yong An designed the study; Eunhyong Chang analyzed the data;  
394 Eunhyong Chang, Hee Sang Hwang, Kyu Jin Song, Kwoneel Kim, Min-Sik Kim, Se Jin Jang,  
395 Kwang Pyo Kim, Sungyong You, Joon-Yong An wrote and reviewed the manuscript; all  
396 authors approved the final version of the manuscript.

397

398 **List of abbreviations:** Whole-genome doubling (WGD), Chromosomal instability (CIN), Breast  
399 cancer (BRCA), Clear cell renal cell carcinoma (CCRCC), Colon adenocarcinoma (COAD),  
400 Glioblastoma (GBM), High-grade serous carcinoma (HGSC), Head and neck squamous cell  
401 carcinoma (HNSCC), Lung adenocarcinoma (LUAD), Lung squamous cell carcinoma (LSCC),  
402 Pancreatic ductal adenocarcinoma (PDAC), Uterine corpus endometrial carcinoma (UCEC)  
403 Loss-of-heterozygosity (LOH), Tumor mutational burden (TMB), Copy number (CN),  
404 Transcription factor (TF)

405

## 406 **Methods**

### 407 **Data collection and preprocessing**

408 We obtained genomic, transcriptomic, global proteomic, and phosphoproteomic data from  
409 the Clinical Proteomic Tumor Analysis Consortium. The mutation annotation format file for  
410 each sample and the segment-level copy number variant (CNV) text file for the samples in  
411 CPTAC phase-3 (comprising clear cell renal cell carcinoma [CCRCC], GBM, HNSCC, lung  
412 squamous cell carcinoma [LSCC], lung adenocarcinoma [LUAD], pancreatic ductal  
413 adenocarcinoma [PDAC], and uterine corpus endometrial carcinoma [UCEC]) were  
414 downloaded from the GDC data portal (<https://portal.gdc.cancer.gov>). Transcriptomic data  
415 were downloaded from the GDC data portal. Global proteomic and phosphoproteomic data  
416 were downloaded from LinkedOmics (<https://www.linkedomics.org/>).

417 To standardize the global phosphoprotein data across various cancer types, we  
418 initially normalized the data using z-scores. Subsequently, global proteins and  
419 phosphoproteins with > 30% missing values in each cancer-type sample were excluded,  
420 followed by k-nearest neighbor imputation with k=5 to address missing values.

421

### 422 **CNV calling and WGD detection**

423 As segment-level CN data for BRCA, COAD, and HGSC were unavailable, we acquired BAM  
424 files from the GDC data portal and performed the CNV calling process. FACETS v0.16.0<sup>71</sup> was  
425 employed to discern allele-specific CN information. The input for FACETS consisted of paired  
426 tumor-normal BAM files and a VCF file containing common and germline polymorphic sites  
427 downloaded from [https://www.ncbi.nlm.nih.gov/variation/docs/human\\_variation\\_vcf/](https://www.ncbi.nlm.nih.gov/variation/docs/human_variation_vcf/).

428 Using major CN and minor CN data derived from segment-level CNV data, we defined  
429 samples as “WGD-positive” if over 50% of their autosomal genome exhibited a major CN  
430 greater than or equal to two<sup>1</sup>.

431

### 432 **Mutational signature analysis**

433 We conducted a mutational signature analysis using the COSMIC signature database v3<sup>72</sup>  
434 and R package Sigminer v2.1.5<sup>73</sup>. Non-negative matrix factorization was employed to  
435 determine the number of signature groups or factorization ranks. This involved creating a  
436 tumor-by-component matrix with 50 runs and checking the ranks ranging from 2 to 12. Each  
437 signature was identified using the COSMIC signature with the highest cosine similarity.



438 Subsequently, hierarchical clustering was performed, and the samples were assigned to one  
439 of the signatures based on the consensus matrix.

440

#### 441 **Analysis of differential expression**

442 To discern the differentially expressed genes between WGD-positive and WGD-negative  
443 samples, we employed the “DESeq” function from the DESeq2 R package <sup>74</sup>. The raw count  
444 data were used for the generation of a DESeqDataSet using the “DESeqDataSetFromMatrix”  
445 function. Following a variance stabilizing transformation and the exclusion of data points  
446 with a mean raw count less than 50, we conducted the differential expression analysis  
447 utilizing the “DESeq” function, which is grounded in the negative binomial distribution. The  
448 DEG analysis was performed using the following formula:

$$design = \sim WGD.status$$

449 To detect the differential expression of global and phospho-proteins in the WGD  
450 samples, we employed an integrated hypothesis testing method following the methodology  
451 proposed by Hwang et al <sup>75</sup>. Briefly, we performed t-tests, median difference tests, and  
452 Wilcoxon tests and combined the p-values from the statistical tests using Stouffer's method.  
453 This approach enhances the accuracy of identifying true-positive data elements compared  
454 with traditional methods when applied to biological data.

455

#### 456 **Gene set enrichment analysis**

457 We conducted a gene set enrichment analysis to elucidate the activated biological pathways  
458 in each sample. The “zscore” function from the R package GSEA <sup>76</sup> was utilized for analyzing  
459 transcriptome, global proteome, and phospho-proteome data. Pathways from various  
460 databases, including hallmark (“h.all.v2023.1.Hs.symbols.gmt.txt”), KEGG  
461 (“c2.cp.kegg.v2023.1.Hs.symbols.gmt.txt”), Reactome  
462 (“c2.cp.reactome.v2023.1.Hs.symbols.gmt.txt”), GO (“c5.go.v2023.1.Hs.symbols.gmt.txt”),  
463 and Wikipathway (“c2.cp.wikipathways.v2023.1.Hs.symbols.gmt.txt”) sourced from MSigDB  
464 were incorporated into the gene set variation analysis. Subsequently, we performed a t-test  
465 between WGD-positive tumors and WGD-negative tumors to identify significantly regulated  
466 pathways in the context of WGD.

467

#### 468 **Estimation of transcription factor and kinase activity**

469 We used the data corresponding to transcription factor (TF)-target interactions from  
470 CollecTRI<sup>77</sup> to estimate TF activity. The log<sub>2</sub>-fold change values derived from the analysis of  
471 differentially expressed genes (DEGs) served as inputs for the identification of TF activity in  
472 WGD-positive samples. For estimating kinase activity, we employed kinase-substrate  
473 interactions sourced from OmniPathR<sup>46</sup>. The log<sub>2</sub>-fold change values obtained from the  
474 analysis of differentially expressed phosphorylated proteins were used as inputs to identify  
475 the kinase activity in WGD-positive samples. Subsequently, we employed the “run\_mlm”  
476 function within the decoupleR R package<sup>33</sup> to infer both TF and kinase activities, with the  
477 minimum size of regulons set to 1.

478

### 479 **Cancer dependency and druggability analysis**

480 For the comparison of cancer dependencies between WGD-positive and WGD-negative cells,  
481 we downloaded “CRISPR (DepMap Public 23Q2+Score, Chronos),” “RNAi  
482 (Achilles+DRIVE+Marcotte, DEMETER2),” and “Aneuploidy” data for each cancer cell line  
483 from DepMap (<https://depmap.org/portal/>). We subset the cell lines with annotated  
484 genome doubling statuses. Cell lines with one or more instances of genome doubling were  
485 classified as WGD-positive, whereas those without genome doubling were categorized as  
486 WGD-negative. We conducted a one-sided Wilcoxon rank-sum test to assess whether the  
487 WGD-positive cells exhibited lower viability than the WGD-negative cells. To evaluate the  
488 druggability of each TF, we used the DGIdb (v5.0.5)<sup>78</sup>. TFs lacking interactions with drugs  
489 were deemed “undruggable,” those with interactions with FDA-approved drugs were  
490 designated as “FDA-approved,” and those interacting with known drugs but not with FDA-  
491 approved ones were labeled as “druggable.”

492

### 493 **Survival analysis**

494 The Kaplan–Meier estimation model was used to perform survival analysis. The survival  
495 duration of the patients and death events were used as inputs for the analysis. To identify  
496 the TFs associated with poor prognosis, we compared survival curves between samples with  
497 the top 50% and bottom 50% protein expression for each significantly activated TF in WGD  
498 (false discovery rate [FDR] < 0.1).

499

### 500 **Drug repurposing network analysis**

501 DrugSt. One (v1.2.0)<sup>53</sup> was used to build the drug repurposing network. Significantly  
502 upregulated kinases (FDR < 0.1) in the WGD for each tumor type were used as inputs for the  
503 search algorithms. NeDRex (v2.21.0) was used for protein-protein and protein-drug  
504 interaction searches. For the protein-protein interaction network, we used a multi-Steiner  
505 algorithm, setting the number of trees to five, tolerance to five, and hub penalty to 0.5. For  
506 the protein-drug interaction network, we used a harmonic centrality algorithm, setting the  
507 hub penalty to 0.5 and the result size to 50 and excluding indirect and non-approved drugs.  
508

509 **Supplemental tables**

510 Table S1.xlsx: Sample overview and copy number signatures associated with WGD

511 Table S2.xlsx: Enriched pathways in WGD

512 Table S3.xlsx: Activated transcription factor in WGD and their druggability

513 Table S4.xlsx: Activated kinases in WGD and drug repurposing network

514

515 **Supplemental figures**

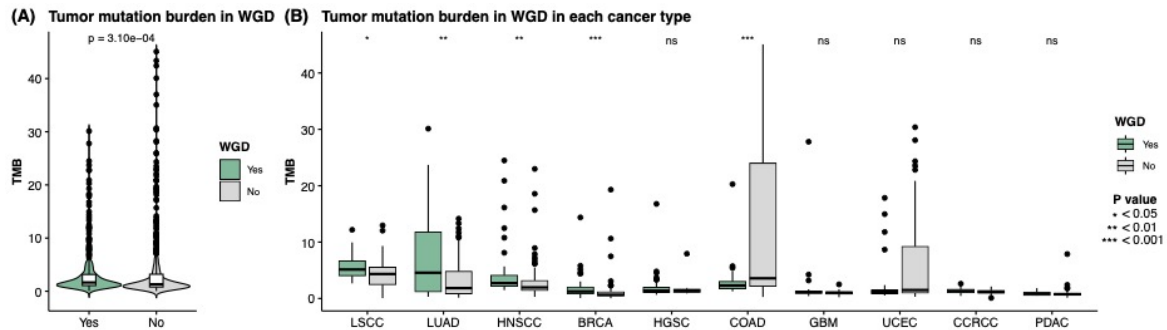

516

517 **Figure S1. Tumor mutation burden in WGD**

518 **(A)** Violin plot comparing tumor mutation burden between WGD-positive and WGD-negative

519 tumors across 10 cancer types. **(B)** Boxplots comparing tumor mutation burden between

520 WGD-positive and WGD-negative tumors within each cancer type.

521

522

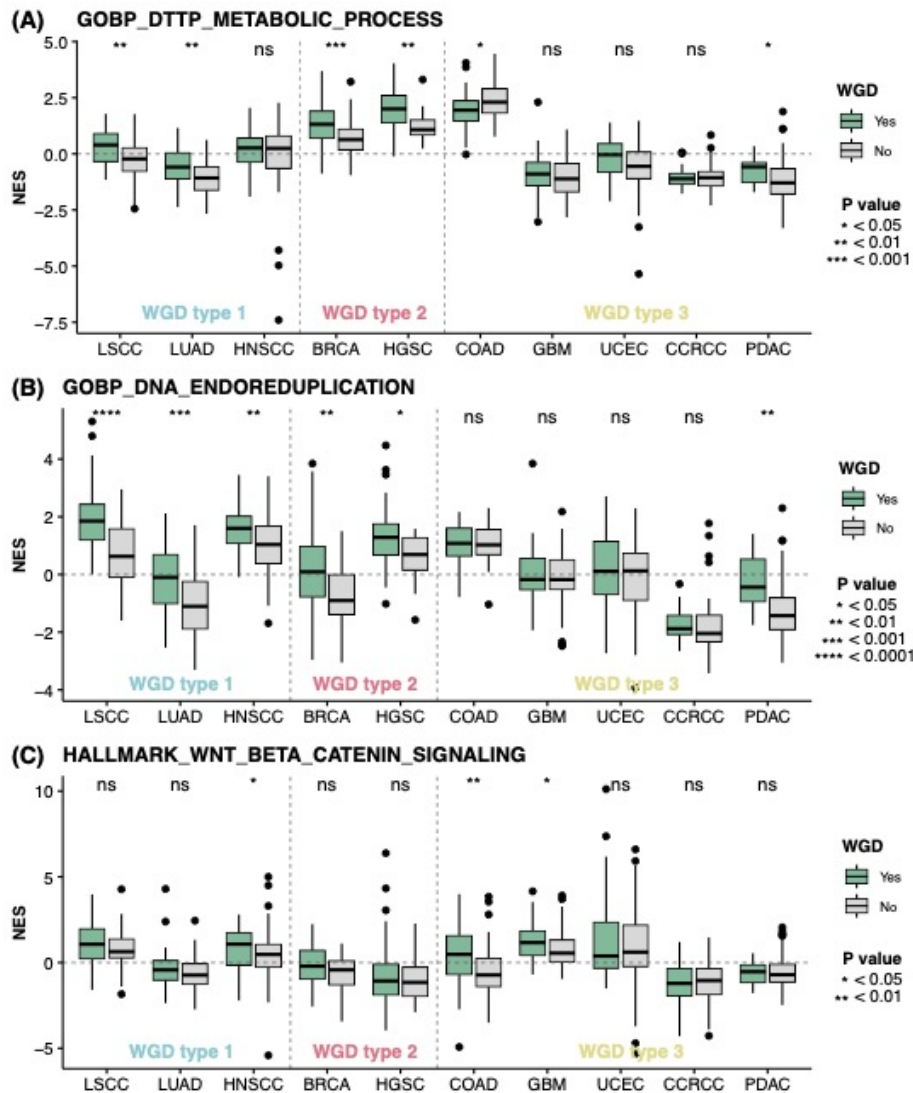

523

524 **Figure S2. Pathway enrichment in WGD-positive tumors**

525 **(A-C)** Boxplot comparing Normalized enrichment scores (NES) score of dTTP metabolism  
526 pathway (GOBP\_DTP\_METABOLIC\_PROCESS), DNA endoreduplication pathway  
527 (GOBP\_DNA\_ENDOREDUPPLICATION), and Wnt signaling pathway  
528 (HALLMARK\_WNT\_BETA\_CATENIN\_SIGNALING) between WGD-positive and WGD-negative  
529 tumors in individual cancer types.  
530

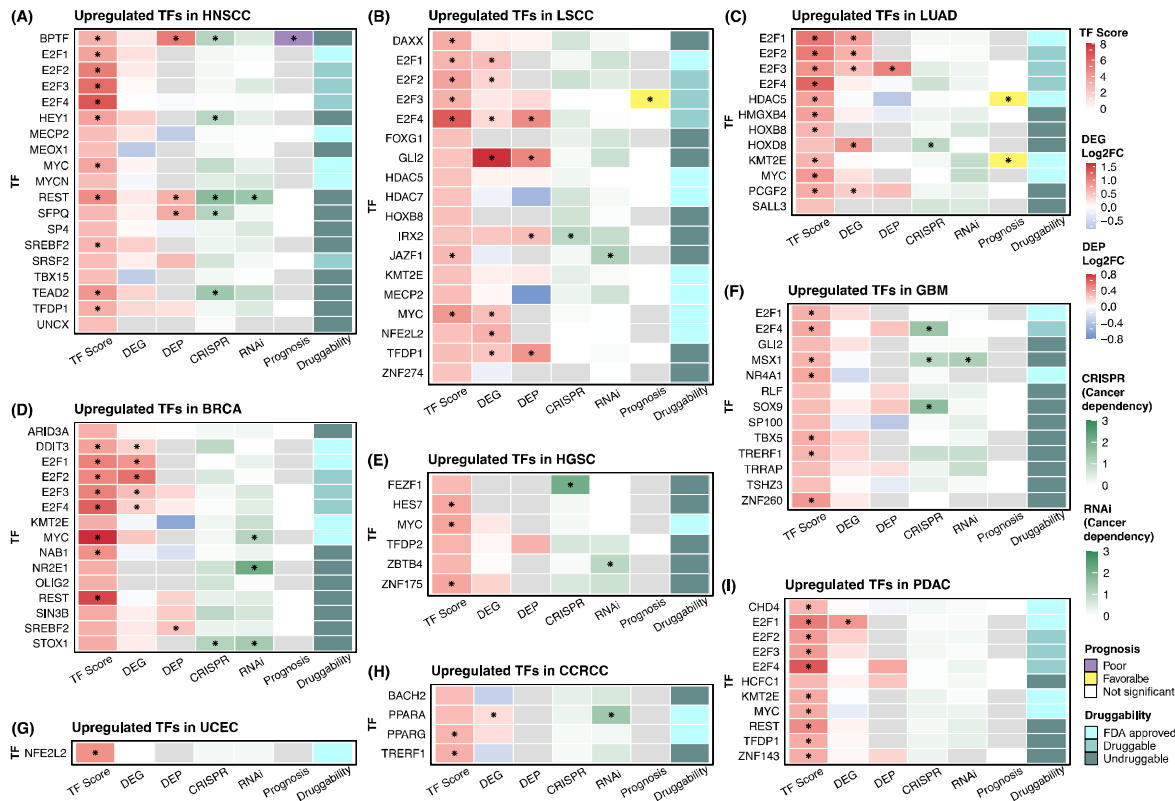

531

532

**Figure S3. Activated TFs in WGD in each cancer type**

533

**(A-I)** Significantly upregulated TFs in WGD in each cancer type are shown. Significant

534

features are indicated as an asterisk (TF score, FDR < 0.05; DEG, FDR < 0.05; DEP, FDR < 0.05;

535

CRISPR,  $p < 0.1$ ; RNAi,  $p < 0.1$ ; Prognosis,  $p < 0.05$ ).

536

537

538 **References**

- 539 1. Bielski CM, Zehir A, Penson AV, et al. Genome doubling shapes the evolution and  
540 prognosis of advanced cancers. *Nat Genet.* Aug 2018;50(8):1189-1195. doi:10.1038/s41588-  
541 018-0165-1
- 542 2. Quinton RJ, DiDomizio A, Vittoria MA, et al. Whole-genome doubling confers unique  
543 genetic vulnerabilities on tumour cells. *Nature.* Feb 2021;590(7846):492-497.  
544 doi:10.1038/s41586-020-03133-3
- 545 3. Zack TI, Schumacher SE, Carter SL, et al. Pan-cancer patterns of somatic copy number  
546 alteration. *Nat Genet.* Oct 2013;45(10):1134-40. doi:10.1038/ng.2760
- 547 4. Lopez S, Lim EL, Horswell S, et al. Interplay between whole-genome doubling and the  
548 accumulation of deleterious alterations in cancer evolution. *Nat Genet.* Mar 2020;52(3):283-  
549 293. doi:10.1038/s41588-020-0584-7
- 550 5. Ganem NJ, Cornils H, Chiu S-Y, et al. Cytokinesis failure triggers hippo tumor  
551 suppressor pathway activation. *Cell.* 2014;158(4):833-848.
- 552 6. Senovilla L, Vitale I, Martins I, et al. An immunosurveillance mechanism controls  
553 cancer cell ploidy. *Science.* 2012;337(6102):1678-1684.
- 554 7. Chang E, An J-Y. Whole-genome doubling is a double-edged sword: the  
555 heterogeneous role of whole-genome doubling in various cancer types. *BMB reports.*  
556 2024:6157-6157.
- 557 8. Heo YJ, Hwa C, Lee GH, Park JM, An JY. Integrative Multi-Omics Approaches in Cancer  
558 Research: From Biological Networks to Clinical Subtypes. *Mol Cells.* Jul 31 2021;44(7):433-  
559 443. doi:10.14348/molcells.2021.0042
- 560 9. Huang C, Chen L, Savage SR, et al. Proteogenomic insights into the biology and  
561 treatment of HPV-negative head and neck squamous cell carcinoma. *Cancer Cell.* Mar 8  
562 2021;39(3):361-379 e16. doi:10.1016/j.ccell.2020.12.007
- 563 10. Satpathy S, Krug K, Jean Beltran PM, et al. A proteogenomic portrait of lung  
564 squamous cell carcinoma. *Cell.* Aug 5 2021;184(16):4348-4371 e40.  
565 doi:10.1016/j.cell.2021.07.016
- 566 11. Gillette MA, Satpathy S, Cao S, et al. Proteogenomic Characterization Reveals  
567 Therapeutic Vulnerabilities in Lung Adenocarcinoma. *Cell.* Jul 9 2020;182(1):200-225 e35.  
568 doi:10.1016/j.cell.2020.06.013
- 569 12. Krug K, Jaehnig EJ, Satpathy S, et al. Proteogenomic Landscape of Breast Cancer  
570 Tumorigenesis and Targeted Therapy. *Cell.* Nov 25 2020;183(5):1436-1456 e31.  
571 doi:10.1016/j.cell.2020.10.036
- 572 13. Vasaikar S, Huang C, Wang X, et al. Proteogenomic Analysis of Human Colon Cancer  
573 Reveals New Therapeutic Opportunities. *Cell.* May 2 2019;177(4):1035-1049 e19.  
574 doi:10.1016/j.cell.2019.03.030
- 575 14. Wang LB, Karpova A, Gritsenko MA, et al. Proteogenomic and metabolomic  
576 characterization of human glioblastoma. *Cancer Cell.* Apr 12 2021;39(4):509-528 e20.  
577 doi:10.1016/j.ccell.2021.01.006
- 578 15. Clark DJ, Dhanasekaran SM, Petralia F, et al. Integrated Proteogenomic  
579 Characterization of Clear Cell Renal Cell Carcinoma. *Cell.* Oct 31 2019;179(4):964-983 e31.  
580 doi:10.1016/j.cell.2019.10.007
- 581 16. McDermott JE, Arshad OA, Petyuk VA, et al. Proteogenomic Characterization of  
582 Ovarian HGSC Implicates Mitotic Kinases, Replication Stress in Observed Chromosomal  
583 Instability. *Cell Rep Med.* Apr 21 2020;1(1)doi:10.1016/j.xcrm.2020.100004



- 584 17. Hu Y, Pan J, Shah P, et al. Integrated Proteomic and Glycoproteomic Characterization  
585 of Human High-Grade Serous Ovarian Carcinoma. *Cell Rep.* Oct 20 2020;33(3):108276.  
586 doi:10.1016/j.celrep.2020.108276
- 587 18. Cao L, Huang C, Cui Zhou D, et al. Proteogenomic characterization of pancreatic  
588 ductal adenocarcinoma. *Cell.* Sep 16 2021;184(19):5031-5052 e26.  
589 doi:10.1016/j.cell.2021.08.023
- 590 19. Cai L, Bai H, Duan J, et al. Epigenetic alterations are associated with tumor mutation  
591 burden in non-small cell lung cancer. *J Immunother Cancer.* Jul 26 2019;7(1):198.  
592 doi:10.1186/s40425-019-0660-7
- 593 20. Chalmers ZR, Connelly CF, Fabrizio D, et al. Analysis of 100,000 human cancer  
594 genomes reveals the landscape of tumor mutational burden. *Genome Med.* Apr 19  
595 2017;9(1):34. doi:10.1186/s13073-017-0424-2
- 596 21. Fearon ER, Vogelstein B. A genetic model for colorectal tumorigenesis. *cell.*  
597 1990;61(5):759-767.
- 598 22. Fodde R, Smits R, Clevers H. APC, signal transduction and genetic instability in  
599 colorectal cancer. *Nature reviews cancer.* 2001;1(1):55-67.
- 600 23. Powell SM, Zilz N, Beazer-Barclay Y, et al. APC mutations occur early during colorectal  
601 tumorigenesis. *Nature.* 1992;359(6392):235-237.
- 602 24. Davoli T, Uno H, Wooten EC, Elledge SJ. Tumor aneuploidy correlates with markers of  
603 immune evasion and with reduced response to immunotherapy. *Science.* Jan 20  
604 2017;355(6322)doi:10.1126/science.aaf8399
- 605 25. Cohen-Sharir Y, McFarland JM, Abdusamad M, et al. Aneuploidy renders cancer cells  
606 vulnerable to mitotic checkpoint inhibition. *Nature.* Feb 2021;590(7846):486-491.  
607 doi:10.1038/s41586-020-03114-6
- 608 26. Nordlund P, Reichard P. Ribonucleotide reductases. *Annu Rev Biochem.* 2006;75:681-  
609 706. doi:10.1146/annurev.biochem.75.103004.142443
- 610 27. Chabes A, Georgieva B, Domkin V, Zhao X, Rothstein R, Thelander L. Survival of DNA  
611 damage in yeast directly depends on increased dNTP levels allowed by relaxed feedback  
612 inhibition of ribonucleotide reductase. *Cell.* 2003;112(3):391-401.
- 613 28. Davoli T, Denchi EL, de Lange T. Persistent telomere damage induces bypass of  
614 mitosis and tetraploidy. *Cell.* Apr 2 2010;141(1):81-93. doi:10.1016/j.cell.2010.01.031
- 615 29. Zeng J, Hills SA, Ozono E, Diffley JFX. Cyclin E-induced replicative stress drives p53-  
616 dependent whole-genome duplication. *Cell.* Feb 2 2023;186(3):528-542 e14.  
617 doi:10.1016/j.cell.2022.12.036
- 618 30. Rubinfeld B, Souza B, Albert I, et al. Association of the APC gene product with  $\beta$ -  
619 catenin. *Science.* 1993;262(5140):1731-1734.
- 620 31. Su L-K, Vogelstein B, Kinzler KW. Association of the APC tumor suppressor protein  
621 with catenins. *Science.* 1993;262(5140):1734-1737.
- 622 32. Korinek V, Barker N, Morin PJ, et al. Constitutive transcriptional activation by a  $\beta$ -  
623 catenin-Tcf complex in APC<sup>-/-</sup> colon carcinoma. *Science.* 1997;275(5307):1784-1787.
- 624 33. Badia-i-Mompel P, Vélez Santiago J, Braunger J, et al. decoupleR: ensemble of  
625 computational methods to infer biological activities from omics data. *Bioinformatics*  
626 *Advances.* 2022;2(1):vbac016.
- 627 34. Dyson N. The regulation of E2F by pRB-family proteins. *Genes & development.*  
628 1998;12(15):2245-2262.
- 629 35. Bretones G, Delgado MD, Leon J. Myc and cell cycle control. *Biochim Biophys Acta.*  
630 May 2015;1849(5):506-16. doi:10.1016/j.bbagr.2014.03.013

- 631 36. Henley MJ, Koehler AN. Advances in targeting 'undruggable' transcription factors  
632 with small molecules. *Nat Rev Drug Discov*. Sep 2021;20(9):669-688. doi:10.1038/s41573-  
633 021-00199-0
- 634 37. Xie X, Yu T, Li X, et al. Recent advances in targeting the "undruggable" proteins: from  
635 drug discovery to clinical trials. *Signal Transduct Target Ther*. Sep 6 2023;8(1):335.  
636 doi:10.1038/s41392-023-01589-z
- 637 38. Richart L, Carrillo-de Santa Pau E, Rio-Machin A, et al. BPTF is required for c-MYC  
638 transcriptional activity and in vivo tumorigenesis. *Nat Commun*. Jan 5 2016;7:10153.  
639 doi:10.1038/ncomms10153
- 640 39. Huang L, Walter V, Hayes DN, Onaitis M. Hedgehog-Gli signaling inhibition  
641 suppresses tumor growth in squamous lung cancer. *Clin Cancer Res*. Mar 15  
642 2014;20(6):1566-75. doi:10.1158/1078-0432.CCR-13-2195
- 643 40. Girling R, Partridge JF, Bandara LR, et al. A new component of the transcription factor  
644 DRTF1/E2F. *Nature*. 1993;362(6415):83-87.
- 645 41. Lam EW-F, La Thangue NB. DP and E2F proteins: coordinating transcription with cell  
646 cycle progression. *Current opinion in cell biology*. 1994;6(6):859-866.
- 647 42. Goldstein JL, DeBose-Boyd RA, Brown MS. Protein sensors for membrane sterols. *Cell*.  
648 Jan 13 2006;124(1):35-46. doi:10.1016/j.cell.2005.12.022
- 649 43. Bengoechea-Alonso MT, Ericsson J. SREBP in signal transduction: cholesterol  
650 metabolism and beyond. *Curr Opin Cell Biol*. Apr 2007;19(2):215-22.  
651 doi:10.1016/j.ceb.2007.02.004
- 652 44. Griffiths B, Lewis CA, Bensaad K, et al. Sterol regulatory element binding protein-  
653 dependent regulation of lipid synthesis supports cell survival and tumor growth. *Cancer &*  
654 *metabolism*. 2013;1:1-21.
- 655 45. Peng F, Liao M, Qin R, et al. Regulated cell death (RCD) in cancer: key pathways and  
656 targeted therapies. *Signal Transduct Target Ther*. Aug 13 2022;7(1):286. doi:10.1038/s41392-  
657 022-01110-y
- 658 46. Turei D, Korcsmaros T, Saez-Rodriguez J. OmniPath: guidelines and gateway for  
659 literature-curated signaling pathway resources. *Nat Methods*. Nov 29 2016;13(12):966-967.  
660 doi:10.1038/nmeth.4077
- 661 47. Rabalski AJ, Gyenis L, Litchfield DW. Molecular Pathways: Emergence of Protein  
662 Kinase CK2 (CSNK2) as a Potential Target to Inhibit Survival and DNA Damage Response and  
663 Repair Pathways in Cancer Cells. *Clin Cancer Res*. Jun 15 2016;22(12):2840-7.  
664 doi:10.1158/1078-0432.CCR-15-1314
- 665 48. Callow MG, Clairvoyant F, Zhu S, et al. Requirement for PAK4 in the anchorage-  
666 independent growth of human cancer cell lines. *J Biol Chem*. Jan 4 2002;277(1):550-8.  
667 doi:10.1074/jbc.M105732200
- 668 49. Li X, Minden A. PAK4 functions in tumor necrosis factor (TNF) alpha-induced survival  
669 pathways by facilitating TRADD binding to the TNF receptor. *J Biol Chem*. Dec 16  
670 2005;280(50):41192-200. doi:10.1074/jbc.M506884200
- 671 50. Cai S, Ye Z, Wang X, et al. Overexpression of P21-activated kinase 4 is associated with  
672 poor prognosis in non-small cell lung cancer and promotes migration and invasion. *J Exp Clin*  
673 *Cancer Res*. May 15 2015;34(1):48. doi:10.1186/s13046-015-0165-2
- 674 51. Kim J, Kundu M, Viollet B, Guan KL. AMPK and mTOR regulate autophagy through  
675 direct phosphorylation of Ulk1. *Nat Cell Biol*. Feb 2011;13(2):132-41. doi:10.1038/ncb2152

- 676 52. Egan DF, Shackelford DB, Mihaylova MM, et al. Phosphorylation of ULK1 (hATG1) by  
677 AMP-activated protein kinase connects energy sensing to mitophagy. *Science*.  
678 2011;331(6016):456-461.
- 679 53. Maier A, Hartung M, Abovsky M, et al. Drugst. One-A plug-and-play solution for  
680 online systems medicine and network-based drug repurposing. *Arxiv*. 2023;
- 681 54. Roth GJ, Binder R, Colbatzky F, et al. Nintedanib: from discovery to the clinic. *J Med*  
682 *Chem*. Feb 12 2015;58(3):1053-63. doi:10.1021/jm501562a
- 683 55. Roshak AK, Capper EA, Imburgia C, Fornwald J, Scott G, Marshall LA. The human polo-  
684 like kinase, PLK, regulates cdc2/cyclin B through phosphorylation and activation of the  
685 cdc25C phosphatase. *Cellular signalling*. 2000;12(6):405-411.
- 686 56. Dai W, Wang Q, Traganos F. Polo-like kinases and centrosome regulation. *Oncogene*.  
687 Sep 9 2002;21(40):6195-200. doi:10.1038/sj.onc.1205710
- 688 57. Takahashi T, Sano B, Nagata T, et al. Polo-like kinase 1 (PLK1) is overexpressed in  
689 primary colorectal cancers. *Cancer Sci*. Feb 2003;94(2):148-52. doi:10.1111/j.1349-  
690 7006.2003.tb01411.x
- 691 58. Han D-p, Zhu Q-l, Cui J-t, et al. Polo-like kinase 1 is overexpressed in colorectal cancer  
692 and participates in the migration and invasion of colorectal cancer cells. *Medical science*  
693 *monitor: international medical journal of experimental and clinical research*.  
694 2012;18(6):BR237.
- 695 59. Mologni L, Cleris L, Magistroni V, et al. Valproic acid enhances bosutinib cytotoxicity  
696 in colon cancer cells. *Int J Cancer*. Apr 15 2009;124(8):1990-6. doi:10.1002/ijc.24158
- 697 60. Li X, Wang Z, Zhang S, Yao Q, Chen W, Liu F. Ruxolitinib induces apoptosis of human  
698 colorectal cancer cells by downregulating the JAK1/2-STAT1-Mcl-1 axis. *Oncol Lett*. May  
699 2021;21(5):352. doi:10.3892/ol.2021.12613
- 700 61. Korashy HM, Maayah ZH, Al Anazi FE, et al. Sunitinib Inhibits Breast Cancer Cell  
701 Proliferation by Inducing Apoptosis, Cell-cycle Arrest and DNA Repair While Inhibiting NF-  
702 kappaB Signaling Pathways. *Anticancer Res*. Sep 2017;37(9):4899-4909.  
703 doi:10.21873/anticancer.11899
- 704 62. Burstein HJ, Elias AD, Rugo HS, et al. Phase II study of sunitinib malate, an oral  
705 multitargeted tyrosine kinase inhibitor, in patients with metastatic breast cancer previously  
706 treated with an anthracycline and a taxane. *J Clin Oncol*. Apr 10 2008;26(11):1810-6.  
707 doi:10.1200/JCO.2007.14.5375
- 708 63. Wang D, Xiao F, Feng Z, et al. Sunitinib facilitates metastatic breast cancer spreading  
709 by inducing endothelial cell senescence. *Breast Cancer Res*. Sep 29 2020;22(1):103.  
710 doi:10.1186/s13058-020-01346-y
- 711 64. Hadi K, Yao X, Behr JM, et al. Distinct Classes of Complex Structural Variation  
712 Uncovered across Thousands of Cancer Genome Graphs. *Cell*. Oct 1 2020;183(1):197-210  
713 e32. doi:10.1016/j.cell.2020.08.006
- 714 65. McClintock B. The behavior in successive nuclear divisions of a chromosome broken  
715 at meiosis. *Proceedings of the National Academy of Sciences*. 1939;25(8):405-416.
- 716 66. Steele CD, Abbasi A, Islam SMA, et al. Signatures of copy number alterations in  
717 human cancer. *Nature*. Jun 2022;606(7916):984-991. doi:10.1038/s41586-022-04738-6
- 718 67. Qu Y, Zhang L, Rong Z, He T, Zhang S. Number of glioma polyploid giant cancer cells  
719 (PGCCs) associated with vasculogenic mimicry formation and tumor grade in human glioma.  
720 *Journal of Experimental & Clinical Cancer Research*. 2013;32:1-7.
- 721 68. Heddleston JM, Li Z, McLendon RE, Hjelmeland AB, Rich JN. The hypoxic  
722 microenvironment maintains glioblastoma stem cells and promotes reprogramming towards

723 a cancer stem cell phenotype. *Cell Cycle*. Oct 15 2009;8(20):3274-84.  
724 doi:10.4161/cc.8.20.9701  
725 69. Xie Q, Mittal S, Berens ME. Targeting adaptive glioblastoma: an overview of  
726 proliferation and invasion. *Neuro Oncol*. Dec 2014;16(12):1575-84.  
727 doi:10.1093/neuonc/nou147  
728 70. Pushpakom S, Iorio F, Eyers PA, et al. Drug repurposing: progress, challenges and  
729 recommendations. *Nat Rev Drug Discov*. Jan 2019;18(1):41-58. doi:10.1038/nrd.2018.168  
730 71. Shen R, Seshan VE. FACETS: allele-specific copy number and clonal heterogeneity  
731 analysis tool for high-throughput DNA sequencing. *Nucleic Acids Res*. Sep 19  
732 2016;44(16):e131. doi:10.1093/nar/gkw520  
733 72. Tate JG, Bamford S, Jubb HC, et al. COSMIC: the Catalogue Of Somatic Mutations In  
734 Cancer. *Nucleic Acids Res*. Jan 8 2019;47(D1):D941-D947. doi:10.1093/nar/gky1015  
735 73. Wang S, Li H, Song M, et al. Copy number signature analysis tool and its application in  
736 prostate cancer reveals distinct mutational processes and clinical outcomes. *PLoS Genet*.  
737 May 2021;17(5):e1009557. doi:10.1371/journal.pgen.1009557  
738 74. Love MI, Huber W, Anders S. Moderated estimation of fold change and dispersion for  
739 RNA-seq data with DESeq2. *Genome Biol*. 2014;15(12):550. doi:10.1186/s13059-014-0550-8  
740 75. Hwang D, Rust AG, Ramsey S, et al. A data integration methodology for systems  
741 biology. *Proceedings of the National Academy of Sciences*. 2005;102(48):17296-17301.  
742 76. Hänzelmann S, Castelo R, Guinney J. GSEA: gene set variation analysis for microarray  
743 and RNA-seq data. *BMC bioinformatics*. 2013;14:1-15.  
744 77. Muller-Dott S, Tsirvouli E, Vazquez M, et al. Expanding the coverage of regulons from  
745 high-confidence prior knowledge for accurate estimation of transcription factor activities.  
746 *Nucleic Acids Res*. Nov 10 2023;51(20):10934-10949. doi:10.1093/nar/gkad841  
747 78. Cannon M, Stevenson J, Stahl K, et al. DGIdb 5.0: rebuilding the drug-gene interaction  
748 database for precision medicine and drug discovery platforms. *Nucleic Acids Res*. Jan 5  
749 2024;52(D1):D1227-D1235. doi:10.1093/nar/gkad1040  
750
